# Supplementary material for: NK Cells in Ascites From Liver Disease Patients Display a Particular Phenotype and Take Part in Antibacterial Immune Response
Source: Front Immunol. 2019 Aug 7;10:1838. doi: 10.3389/fimmu.2019.01838 (PMC6694841; doi:10.3389/fimmu.2019.01838)
Supplement: Supplementary file 1 [file Table_1.XLSX]

## Sheet: Tabelle1
specificity	clone	company	colour
lymphocyte subsets
anti-CD3	UCHT1	BD Pharmingen	BV421
anti-CD3	UCHT1	Biolegend	APC-Cy7
anti-CD3	SK7	BD Pharmingen	PE-Cy7
anti-CD3	UCHT1	BD Pharmingen	APC
anti-CD4	RPA-T4	BD Pharmingen	PE
anti-CD4	RPA-T4	eBioscience	PerCP-Cy5.5
anti-CD8	RPA-T8	BD Pharmingen	PECF-594
anti-CD8	BW135/80	Miltenyi Biotec	PerCP-Vio700
anti-CD14	TÜK4	Miltenyi Biotec	VioBlue
anti-TCRgd	11F2	Miltenyi Biotec	PE-Vio770
anti-CD127	RDR5	eBioscience	FITC
anti-CD25	M-A251	BD Pharmingen	BV421
anti-CD161	191B8	Miltenyi Biotec	PE
anti-Va7.2	3C10	Biolegend	APC-Cy7
anti-CD56	HCD56	Biolegend	APC
anit-CD56	AF12-7H3	Miltenyi Biotec	PE-Vio770
anti-CD16	REA423	Miltenyi Biotec	FITC
anti-CD16	MB15-18C9	Miltenyi Biotec	FITC
anti-CD19	LT19	Miltenyi Biotec	APC-Vio770
Surface Markers
anti-CD363/anti-S1PR1	SW4GYPP	Fisher scientific	eFluor660
anti-S1P5	#282503	R&D	APC
anti-CXCR3	G025H7	Biolegend	PE
anti-CD103	Ber-ACT8	Biolegend	PE
anti-CXCR6	K041E5	Biolegend	PE
anti-CD49e	NKI-SAM1	Miltenyi Biotec	PE
anti-CD27	M-T271	BD Pharmingen	Pe-Cy7
anti-HLA-DR	L243	Biolegend	FITC
anti-NKG2D	1D11	Biolegend	PerCP-Cy5.5
anti-NKp46	9E2	eBioscience	eFluor450
anti-CD69	FN50	Biolegend	APC
anti-NKG2A	REA110	Miltenyi Biotec	PE
anti-NKR2B4	REA112	Miltenyi Biotec	PE
Intracellular Antibodies
Anti-Eomes	WD1928	eBioscience	PE
Anti-Tbet	4B10	eBioscience	eFlour660
Anti-Granulysin	DH2	Biolegend	PE
Anti-Ki67	B56	BD Pharmingen	AF647
anti-IP10	J034D6	Biolegend	PE
anti-IL2	MQ1-17H12	eBioscience	APC
anti-IL10	JES3-19F1	Biolegend	PE
anti-IL12	HP40	eBioscience	PE
anti-TNFalpha	MAb11	eBioscience	PE
anti-GM-CSF	BVD2-21C11	Biolegend	PE
anti-IFNg	4S.B3	eBioscience	FITC
Blocking Antibodies
anti-IL12p70	#24910	R&D
anti-IL18	125-2H	MBL
anti-CXCR3	G025H7	Biolegend
anti-IFNg	B27	Biolegend
